# Supplementary material
Source: Elsevier journal article supplement (https://www.sciencedirect.com/science/article/pii/S0014256513002427)
Supplement: mmc1 [file S0014256513002427:mmc1.docx]

**La respuesta correcta es la “d”:**

La radiología de tórax evidencia un hidroneumopericardio importante (fig. 1, flechas blancas) y una hernia de hiato retrocardiaca (fig. 1, flecha azul) con nivel hidroaéreo característico (fig. 1, flecha negra). El paciente falleció en pocas horas; se realizó autopsia en la que se evidenció una gran hernia de hiato con una úlcera en el fundus gástrico perforada y fistulizada al saco pericárdico.
